# Supplementary material for: Design of an array structure for carbon-based field-effect-transistor type gas sensors to accurately identify trace gas species
Source: Royal Society of Chemistry journal article supplement (doi:10.1039/d3ta02070c), 2023-01-01
Supplement: d3ta02070c1.pdf [file d3ta02070c1.pdf]

## Supporting Information

# Design of Array Structure for Carbon-based Field-Effect-Transistor Type Gas Sensor to Accurately Identify Trace Gas Species

Qiao-qiao Zou<sup>1</sup>, Bin-Liu<sup>1</sup>, Yong Zhang\*

<sup>1</sup> Qiao-qiao Zou and Bin-Liu contributed equally to this work

Q. Q. Zou, B. Liu, Y. Zhang\*

School of Physics and Optoelectronics, Xiangtan University, Xiangtan 411105, PR China.

Y. Zhang\*

Hunan Institute of Advanced Sensing and Information Technology, Xiangtan University,  
Xiangtan 411105, PR China.

Y. Zhang\*

e-mail: [zhangyong@xtu.edu.cn](mailto:zhangyong@xtu.edu.cn)

---

\* Corresponding author. Tel: +86-0731-58293332.  
E-mail address: [zhangyong@xtu.edu.cn](mailto:zhangyong@xtu.edu.cn) (Y. Zhang).

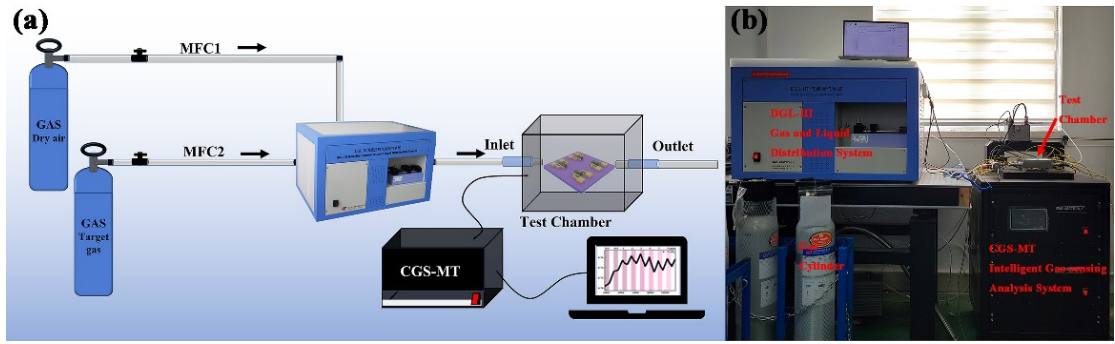

**Fig. S1** (a) Schematic diagram of the gas sensing test system. (b) Digital photo of the gas sensing

test

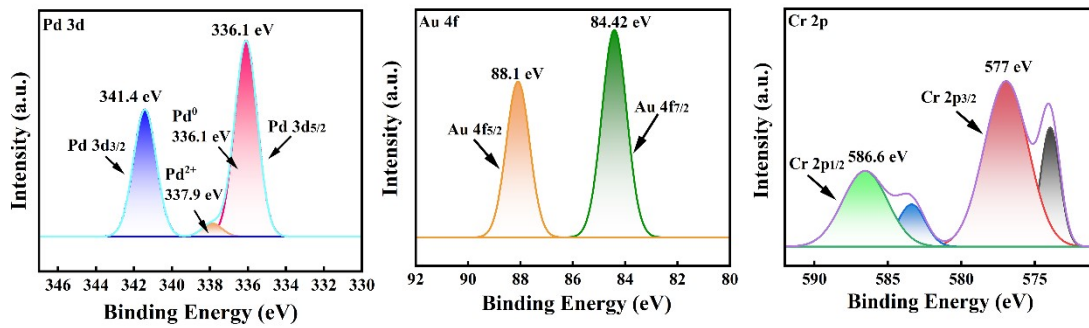

**Fig. S2** The high-resolution XPS spectra of (f)Pd 3d, (g)Au 4f and(h) Cr 2p, respectively.

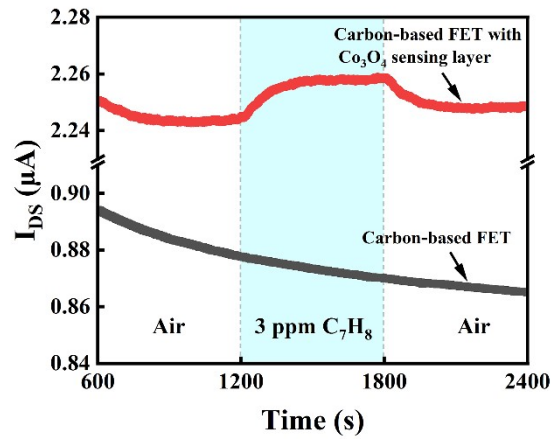

**Fig. S3** Response/recovery curves of the carbon-based FET with and without  $\text{Co}_3\text{O}_4$  sensing layer

at 3 ppm  $\text{C}_7\text{H}_8$ , respectively.

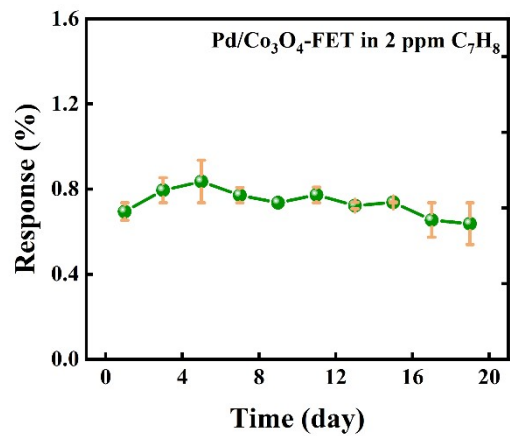

**Fig. S4** Response values of the Pd/Co<sub>3</sub>O<sub>4</sub>-FET at 2 ppm C<sub>7</sub>H<sub>8</sub> for up to 20 days.

**Table S1 Comparison of the key features of the Pd/Co<sub>3</sub>O<sub>4</sub>-FET and various previously reported toluene gas sensors.**

| Sensing material                                                          | Sensor type       | Operating temperature | Gas concentration | Advantages                                                                  | Reference |
|---------------------------------------------------------------------------|-------------------|-----------------------|-------------------|-----------------------------------------------------------------------------|-----------|
| Pd-Loaded SnO <sub>2</sub>                                                | Resistive         | 350°C                 | 1 ppm             | High selectivity for p-methylbenzene                                        | [1]       |
| Co <sub>3</sub> O <sub>4</sub> , Pd-Loaded Co <sub>3</sub> O <sub>4</sub> | Resistive         | 250-350°C             | 5 ppm             | Highly selective, sensitive, and reliable manner                            | [2]       |
| Cr <sub>2</sub> O <sub>3</sub>                                            | Resistive         | 170°C                 | 1 ppm             | Simple preparation                                                          | [3]       |
| Pd-loaded quintuple-shelled Co <sub>3</sub> O <sub>4</sub>                | Resistive         | 250°C                 | 0.25-5 ppm        | Ultrahigh response, ultrahigh selectivity                                   | [4]       |
| NiO/NiMoO <sub>4</sub>                                                    | Resistive         | 325-425°C             | 0.25 ppm          | High selectivity and response                                               | [5]       |
| Pd/Co <sub>3</sub> O <sub>4</sub>                                         | Floating-gate FET | Room temperature      | 80 ppb            | Low power consumption, low detection limit, integrability, mass preparation |           |

**Table S2 Comparison of response values (%) of the four gas sensing units to five gases at 3 ppm**

|                         | Gas sensing unit                                                                                                                                                  |                                                                                                                                                                   |                                                                                                                                                                   |                                                                                                                                                                   |
|-------------------------|-------------------------------------------------------------------------------------------------------------------------------------------------------------------|-------------------------------------------------------------------------------------------------------------------------------------------------------------------|-------------------------------------------------------------------------------------------------------------------------------------------------------------------|-------------------------------------------------------------------------------------------------------------------------------------------------------------------|
|                         | Co <sub>3</sub> O <sub>4</sub> -FET                                                                                                                               | Pd/Co <sub>3</sub> O <sub>4</sub> -FET                                                                                                                            | Au/Co <sub>3</sub> O <sub>4</sub> -FET                                                                                                                            | Cr/Co <sub>3</sub> O <sub>4</sub> -FET                                                                                                                            |
| Response value ordering | R <sub>C<sub>6</sub>H<sub>6</sub></sub> > R <sub>HCHO</sub> > R <sub>NH<sub>3</sub></sub> > R <sub>NO<sub>2</sub></sub> > R <sub>C<sub>7</sub>H<sub>8</sub></sub> | R <sub>C<sub>6</sub>H<sub>6</sub></sub> > R <sub>HCHO</sub> > R <sub>NH<sub>3</sub></sub> > R <sub>C<sub>7</sub>H<sub>8</sub></sub> > R <sub>NO<sub>2</sub></sub> | R <sub>NO<sub>2</sub></sub> > R <sub>HCHO</sub> > R <sub>C<sub>7</sub>H<sub>8</sub></sub> > R <sub>NH<sub>3</sub></sub> > R <sub>C<sub>6</sub>H<sub>6</sub></sub> | R <sub>HCHO</sub> > R <sub>C<sub>7</sub>H<sub>8</sub></sub> > R <sub>C<sub>6</sub>H<sub>6</sub></sub> > R <sub>NH<sub>3</sub></sub> > R <sub>NO<sub>2</sub></sub> |

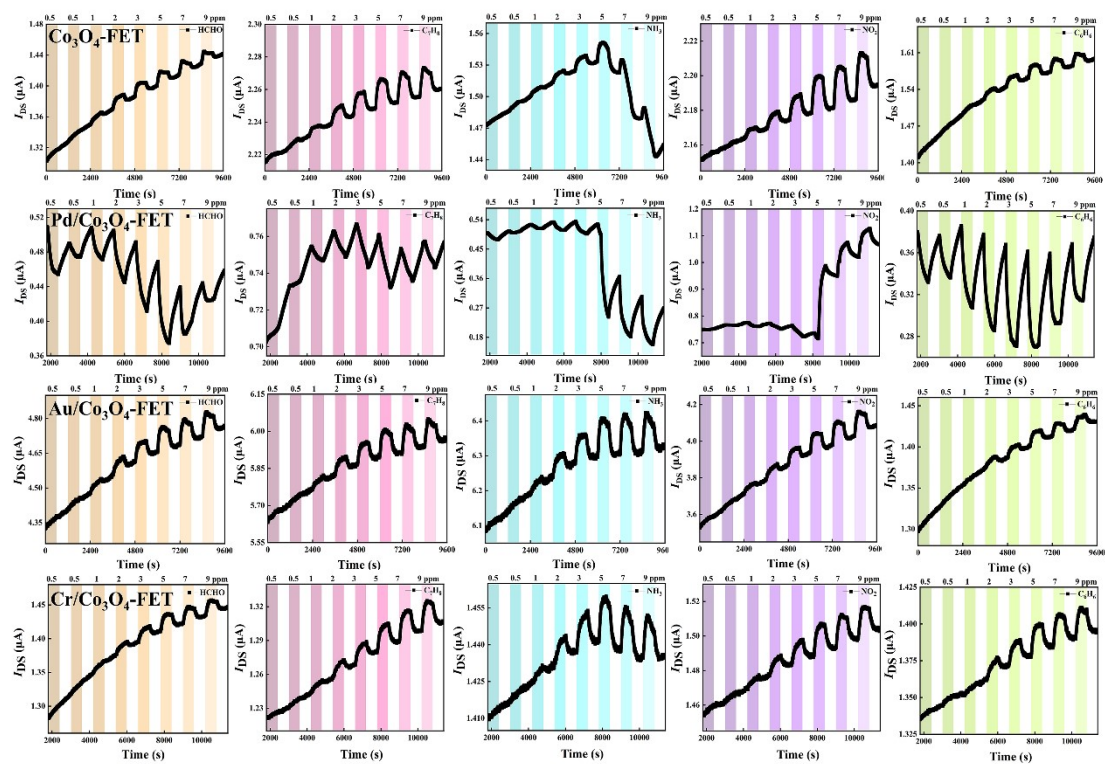

**Fig. S5** Dynamic response/recovery curves of  $\text{Co}_3\text{O}_4$ -FET, Pd/  $\text{Co}_3\text{O}_4$ -FET, Pd/  $\text{Co}_3\text{O}_4$ -FET and Cr/  $\text{Co}_3\text{O}_4$ -FET to HCHO,  $\text{C}_7\text{H}_8$ ,  $\text{NH}_3$ ,  $\text{NO}_2$  and  $\text{C}_6\text{H}_6$  at the range of 0.5-9 ppm, respectively.

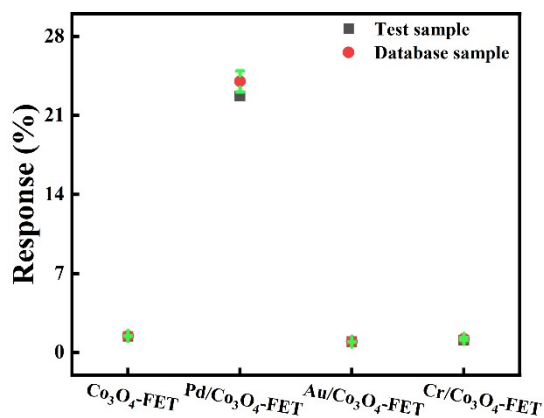

**Fig. S6** Comparison of the response values of the carbon-based FET gas sensor array to the test sample and the database sample.
